# Supplementary material for: Low-pressure storms drive nitrous oxide emissions in the Southern Ocean
Source: Research Square preprint supplement (doi:10.21203/rs.3.rs-6378208/v1), 2025-04-30
Supplement: Supplementary file 1 [file 7b3cf2e0d45f28bd94d5a57e.xlsx]

## Sheet: Sheet1
Supplementary Table 1. GO-SHIP cruises included in training dataset. The tracer groups make measurements of both chlorofluorocarbons (CFCs) and N2O; the lead PI, samplers, and analysts for the full tracer group are listed on each cruise.
Expocode	WOCE Lines	Year	Country	N2O/CFC Lead	N2O/CFC Samplers & Analysts
49NZ20051031	P03, P03E	2005	JP	N. Yoshida	A. Fujii, S. Toyoda, O. Yoshida, S. Watanabe, K. Sasaki & N. Yoshida
49NZ20070724	P01	2007	JP	N. Yoshida	O. Yoshida, S. Watanabe, A. Fujii, H. Yamagishi, S. Toyoda, & N. Yoshida
33RO20100308	A13, A13.5, AJAX	2010	US	J. Bullister	B.X. Chang, D. Wisegarver, P. Boylan, & I. Frenger
33RO20110926	A10	2011	US	J. Bullister	B.X. Chang, D. Wisegarver, and D. Pilcher.
29AH20120622	OVIDE, AR07W	2012	ES	M. de la Paz	M. de la Paz
29HE20130320	A17	2013	ES	M. de la Paz	M. de la Paz & E. Royo
33RO20130803	A16N	2013	US	J. Bullister	B.X. Chang, D. Wisegarver, J. Hertzberg, & K. Freeman
33RO20131223	A16S, A23	2013-2014	US	J. Bullister	B.X. Chang, D. Wisegarver & P. Mears
320620140320	P16, P16S	2014	US	M.J. Warner	B.X. Chang, M.J. Warner, P. Mears, & K. Kirk
33RO20150410	P16C, P16N, P16	2015	US	J. Bullister	B.X. Chang, D. Wisegarver & X. Lu
33RO20150525	P16N, P16	2015	US	J. Bullister	B.X. Chang, D. Wisegarver & S. Wensman
33HQ20150809	ARC01	2015	US	A. Bourbonnais	A. Bourbonnais
096U20160426	P15S	2016	AU & US	M.J. Warner & J. Bullister	B.X. Chang, D. Wisegarver, & R.E. Sonnerup
33RO20161119	P18	2016	US	J. Bullister	B.X. Chang
096U20180111	S04, SR03, SR3, P11S	2018	AU & US	M.J. Warner	M.J. Warner & D. Anderson
320620180309	S04P	2018	US	M.J. Warner	M.J. Warner, B.X. Chang, E. Gorman, & M. Rintoul
33RO20180423	I07N	2018	US	J. Bullister	B.X. Chang, C. Kleinwort, & K. Williams
325020190403	I06S	2019	US	D-H. Min	D. Cooper, M. Lopez, & G. Walsh
49NZ20191205	I08N	2019	JP	A. Makabe	A. Makabe & S. Kawagucci
325020210316	A20	2021	US	M.J. Warner	M.J. Warner, R.E. Sonnerup, & C.L. Mejías-Rivera
325020210420	A22	2021	US	M.J. Warner	M.J. Warner, B.X. Chang, & L. Henderson
33RR20220430	P02, P02W	2022	US	D-H. Min	D. Cooper, C. Gonzalez, & S. Wayne
33RR20220613	P02, P02E	2022	US	D-H. Min	D. Cooper, C. Gonzalez, & M. Varas
33RO20230306	A16N	2023	US	R.E. Sonnerup	D. Cooper, M. Miller, & R. Bramblett
33RR20230722	I05	2023	US	M.J. Warner	M.J. Warner, C. Gonzalez, & M. Gaspar
