# Supplementary material for: Low-pressure storms drive nitrous oxide emissions in the Southern Ocean
Source: Research Square preprint supplement (doi:10.21203/rs.3.rs-6378208/v1), 2025-04-30
Supplement: Supplementary file 1 [file 15e26de2e61493cdc0cc0a5c.pdf]

Supplementary information for

## Low-pressure storms drive nitrous oxide emissions in the Southern Ocean

Colette L. Kelly<sup>1\*</sup>, Bonnie X. Chang<sup>2</sup>, Andrea F. Emmanuelli<sup>1,3</sup>, Ellen R. Park<sup>1,3</sup>, Alison M. Macdonald<sup>4</sup>, and David P. Nicholson<sup>1</sup>

<sup>1</sup>Department of Marine Chemistry and Geochemistry, Woods Hole Oceanographic Institution, Woods Hole, MA 02543, USA

<sup>2</sup>The Cooperative Institute for Climate, Ocean, and Ecosystem Studies, University of Washington, Seattle, WA 98195, USA

<sup>3</sup>MIT-WHOI Joint Program in Oceanography, Cambridge and Woods Hole, MA 02543, USA

<sup>4</sup>Department of Physical Oceanography, Woods Hole Oceanographic Institution, Woods Hole, MA 02543, USA

### Corresponding authors

Please address future correspondence to both C.L. Kelly ([colette.kelly@whoi.edu](mailto:colette.kelly@whoi.edu)) and D.P. Nicholson ([dnicholson@whoi.edu](mailto:dnicholson@whoi.edu)).

### Contents of this file:

Supplementary Text S1: Calculation of Air-Sea Gas Exchange

## Supplementary Text S1: Calculation of Air-Sea Gas Exchange

The air-sea flux of N<sub>2</sub>O depends on the disequilibrium between ocean and atmosphere:

$$\Delta pN_2O = pN_2O_{sw} - pN_2O_{atm} \quad (S1)$$

where  $\Delta pN_2O$  is the air-sea partial pressure disequilibrium in natm,  $pN_2O_{sw}$  is the partial pressure of N<sub>2</sub>O in the surface seawater, and  $pN_2O_{atm}$  is the partial pressure of N<sub>2</sub>O in the atmosphere at the air-sea interface.

We calculated the atmospheric partial pressure of N<sub>2</sub>O at the air-sea interface from its atmospheric mixing ratio, the barometric pressure at sea level, and the vapor pressure of water at the air-sea interface. Because one mole of N<sub>2</sub>O occupies 0.7% less volume than an ideal gas, we also included a fugacity factor<sup>1</sup> to account for non-ideal behavior:

$$pN_2O_{atm} = XN_2O_{atm} \cdot f \cdot (P - rh \cdot vp_{sw}) \quad (S2)$$

where  $pN_2O_{atm}$  is the partial pressure of N<sub>2</sub>O in the atmosphere,  $f$  is a fugacity factor to correct for the non-ideal behavior of N<sub>2</sub>O,  $P$  is the barometric pressure,  $rh$  is the relative humidity at the air-sea interface, and  $vp_{sw}$  is the vapor pressure of seawater. We assumed that the relative humidity at the air-sea interface was 100%, i.e.,  $rh = 1$ .

Using an updated version of an existing gas exchange toolbox<sup>2</sup>, we calculated air-sea N<sub>2</sub>O flux as the average of two different parameterizations of air-sea gas exchange:

$$F = F_{W14} + F_{L13} \quad (S3)$$

where  $F$  denotes the air-sea flux of N<sub>2</sub>O associated with a given BGC Argo float profile.  $F_{W14}$  and  $F_{L13}$  denote the air-sea flux of N<sub>2</sub>O in  $\mu\text{mol m}^{-2} \text{ day}^{-1}$  calculated according to ref<sup>3</sup> and ref<sup>4</sup>, respectively. The first of these parameterizations of air-sea gas exchange<sup>3</sup> has a single, quadratic dependence on wind speed:

$$F_{W14} = (1 - f_{ice}) \cdot 0.251 \cdot (U_{10})^2 \cdot \left(\frac{Sc}{660}\right)^{-0.5} \cdot k_H \cdot \Delta pN_2O \quad (S4)$$

where  $f_{ice}$  is the fractional ice cover, 0.251 is a scaling factor<sup>3</sup>,  $U_{10}$  is the wind speed at 10 m above the sea surface in  $\text{m s}^{-1}$ ,  $Sc$  is the dimensionless water-side Schmidt number of N<sub>2</sub>O,  $k_H$  is the Henry's Law constant in  $\text{mol m}^{-3} \text{ atm}^{-1}$ , and  $\Delta pN_2O$  is the air-sea partial pressure disequilibrium in atm.

The second gas exchange parameterization<sup>4</sup> has a quasi-linear dependence of diffusion across the air-sea interface but a roughly cubic dependence for bubble-mediated exchange. The total flux is the sum of the diffusive and bubble-mediated components:

$$F_{L13} = -(1 - f_{ice}) \cdot (F_D + F_P + F_C) \quad (S5)$$

where  $F_{L13}$  denotes the air-sea flux of N<sub>2</sub>O in  $\mu\text{mol m}^{-2} \text{ day}^{-1}$ ,  $F_D$  is the diffusive component of gas exchange,  $F_P$  is the component due to large bubbles that partially dissolve, and  $F_C$  is

the component due to small bubbles that completely dissolve. Note that the sign of the flux must be reversed so that a positive value corresponds to flux out of the water. These three components are modeled as:

$$F_D = k_s \cdot G_{eq,1atm} \cdot (p_{corr} - \sigma) \quad (S6)$$

$$F_P = k_b \cdot G_{eq,1atm} \cdot ((1 + \Delta p)p_{corr} - \sigma) \quad (S7)$$

$$F_C = XN_2O_{atm} \cdot k_c \quad (S8)$$

where  $k_s$ ,  $k_b$ , and  $k_c$  are the piston velocities for the diffusive, large bubble, and small bubble components of gas exchange, respectively. The term  $\Delta p$  denotes the supersaturation maintained by large bubbles that partially dissolve.  $G_{eq,1atm}$  is the concentration of  $N_2O$  in equilibrium with the atmosphere at 1 atm:

$$G_{eq,1atm} = XN_2O_{atm} \cdot f \cdot (1 - rh \cdot vp_{sw}) \quad (S9)$$

$p_{corr}$  is a correction to the local barometric pressure at sea level:

$$p_{corr} = \left( \frac{P - rh \cdot vp_{sw}}{1 - rh \cdot vp_{sw}} \right) \quad (S10)$$

and  $\sigma$  is the ratio of the seawater and atmospheric partial pressures of  $N_2O$ , referenced to 1 atm:

$$\sigma = \frac{pN_2O_{sw}}{XN_2O_{atm} \cdot f \cdot (1 - rh \cdot vp_{sw})} \quad (S11)$$

The wind speed-dependent components of the flux are:

$$k_s = \frac{U_{10} \cdot \sqrt{C_d}}{r_{wt} + r_{at} \cdot \alpha} \quad (S12)$$

$$k_b = 1.98 \times 10^6 \left( U_{10} \sqrt{C_d \rho_a / \rho_w} \right)^{2.76} \left( \frac{Sc}{660} \right)^{-2/3} \quad (S13)$$

$$k_c = 5.56 \left( U_{10} \sqrt{C_d \rho_a / \rho_w} \right)^{3.86} \quad (S14)$$

$$\Delta p = 1.5244 \left( U_{10} \sqrt{C_d \rho_a / \rho_w} \right)^{1.06} \quad (S15)$$

where  $C_d$  is the wind speed-based drag coefficient,  $r_{wt}$  is the water-side resistance to transfer,  $r_{at}$  is the air-side resistance to transfer, and  $\alpha$  is the dimensionless solubility of  $N_2O$  in seawater, following ref<sup>5</sup>;  $\rho_a$  and  $\rho_w$  are the densities of air and water, respectively.

These parameterizations<sup>3,4</sup> represent high-end and low-end estimates of  $N_2O$  flux respectively, because  $N_2O$  is highly soluble (Ostwald solubility of  $\sim 1$ )<sup>1</sup> and thus the

nonlinear, bubble-mediated component is likely to be small (Supplementary Fig. 13). We used the ERA5 reanalysis barometric pressure at sea level, sea ice cover, and u- and v-components of the wind speed<sup>6</sup> to calculate air-sea flux.

The total integrated N<sub>2</sub>O flux from the Southern Ocean was calculated by summing the total flux from each zone and month:

$$F_t = \sum_{i=1}^5 \sum_{j=1}^{12} F_{i,j} \quad (\text{S16})$$

where  $F_{i,j}$  is the integrated flux in zone  $i$  and month  $j$ , in units of  $\mu\text{mol zone}^{-1} \text{ month}^{-1}$ .  $F_{i,j}$  is calculated by weighting the mean flux in a given zone and month by the area of that zone and number of days in that month:

$$F_{i,j} = \frac{1}{n} \left( \sum_{k=1}^n F_k \right) \cdot A_{\text{zone}} \cdot D_{\text{month}} \quad (\text{S17})$$

where  $F_k$  denotes individual fluxes in zone  $i$  and month  $j$  in units of  $\mu\text{mol m}^{-2} \text{ day}^{-1}$ ,  $n$  is the number of profiles occurring in that zone and month,  $A_{\text{zone}}$  is the area of that zone in  $\text{m}^2$ , and  $D_{\text{month}}$  is the number of days in that month. The areas of each zone were based on previously published values corresponding to climatological mean locations of fronts<sup>18</sup>. Similarly, area- and time-integrated fluxes associated with individual float profiles were calculated from:

$$F_{\text{integrated}} = \frac{1}{n} (F) \cdot A_{\text{zone}} \cdot D_{\text{month}} \quad (\text{S18})$$

where  $F$  is the flux associated with an individual float profile.

## Supplementary references

1. Weiss, R. F. & Price, B. A. Nitrous oxide solubility in water and seawater. *Mar. Chem.* **8**, 347–359 (1980).
2. Manning, C. C. M. & Nicholson, D. P. dnicholson/gas\_toolbox: MATLAB code for calculating gas fluxes. Zenodo <https://doi.org/10.5281/zenodo.6126685> (2022).
3. Wanninkhof, R. Relationship between wind speed and gas exchange over the ocean revisited. *Limnol. Oceanogr. Methods* **12**, 351–362 (2014).
4. Liang, J.-H. *et al.* Parameterizing bubble-mediated air-sea gas exchange and its effect on ocean ventilation. *Glob. Biogeochem. Cycles* **27**, 894–905 (2013).
5. Fairall, C. W. *et al.* Implementation of the Coupled Ocean-Atmosphere Response Experiment flux algorithm with CO<sub>2</sub>, dimethyl sulfide, and O<sub>3</sub>. *J. Geophys. Res. Oceans* **116**, (2011).
6. Hersbach, H. *et al.* ERA5 hourly data on single levels from 1940 to present. Copernicus Climate Change Service (C3S) Climate Data Store (CDS) <https://doi.org/10.24381/cds.adbb2d47> (2023).
7. Swift, J. H. *Reference-Quality Water Sample Data: Notes on Acquisition, Record Keeping, and Evaluation*. [http://www.go-ship.org/Manual/Swift\\_DataEval.pdf](http://www.go-ship.org/Manual/Swift_DataEval.pdf) (2010).
